# Supplementary material for: Computational study of oxygen atom (3P and 1D) reactions with CF3CN
Source: Royal Society of Chemistry journal article supplement (doi:10.1039/c004284f), 2010-01-01

## Supporting information

### Computational Study of Oxygen Atom ( $^3\text{P}$ and $^1\text{D}$ ) Reaction with $\text{CF}_3\text{CN}$

Jingyu Sun,<sup>1</sup> Yizhen Tang,<sup>2</sup> Xiujuan Jia,<sup>1</sup> Fang Wang,<sup>1</sup> Hao Sun,<sup>1,3</sup> Yunju Zhang,<sup>1</sup>

ShuWei Tang,<sup>1</sup> Fengdi Wang,<sup>1</sup> Yingfei Chang,<sup>1\*</sup> Yongji Lu,<sup>4</sup> Xiumei Pan,<sup>1</sup>

Jingping Zhang<sup>1</sup> and Rongshun Wang<sup>1\*</sup>

<sup>1</sup>*Institute of Functional Material Chemistry, Faculty of Chemistry, Northeast Normal*

*University, Renmin Road 5268. Changchun, Jilin 130024 P.R. China*

<sup>2</sup>*Centre for Theoretical and Computational Chemistry, Department of Chemistry,*

*University of Oslo, P.O. Box. 1033, Blindern 0315 Oslo, Norway*

<sup>3</sup>*Institute of Theoretical Chemistry, State Key Laboratory of Theoretical and*

*Computational Chemistry, Jilin University, Changchun, Jilin 130023, P.R. China*

<sup>4</sup>*Department of Aviation Theory, Aviation University of Air Force, Changchun, Jilin*

*130022, P.R. China*

---

\* Corresponding author. Email address: [changyf299@nenu.edu.cn](mailto:changyf299@nenu.edu.cn) Tel.: 0431-85099511; Fax: 0431-85099511

\* Corresponding author. Email address: [wangrs@nenu.edu.cn](mailto:wangrs@nenu.edu.cn) Tel.: 0431-85099511; Fax: 0431-85099511

Table S1: The moment of inertia ( $I_a$ ,  $I_b$  and  $I_c$ ), rotational constants, rotational symmetry number, optical isomers number of various species involved in the reactions.

| species                                           | $I_a, I_b, I_c$<br>(amu bohr <sup>2</sup> ) | Rotational<br>Constants<br>(GHZ) | $N_{\text{rotational}}$<br>symmetry | $N_{\text{optical}}$<br>isomers |
|---------------------------------------------------|---------------------------------------------|----------------------------------|-------------------------------------|---------------------------------|
| CF <sub>3</sub> CN( <sup>1</sup> A <sub>1</sub> ) | 320.64107<br>614.58339<br>614.58339         | 5.62854<br>2.93653<br>2.93653    | 3                                   | 1                               |
| CF <sub>2</sub> CN( <sup>2</sup> A')              | 164.70663<br>443.80055<br>607.21306         | 10.95731<br>4.06656<br>2.97217   | 1                                   | 1                               |
| OF( <sup>2</sup> Π)                               | 0.00000<br>56.75885<br>56.75885             | 31.796649                        | 1                                   | 1                               |
| CF <sub>3</sub> ( <sup>2</sup> A <sub>1</sub> )   | 167.75373<br>167.75373<br>324.16953         | 10.75828<br>10.75828<br>5.56728  | 3                                   | 1                               |
| NCO( <sup>2</sup> Π)                              | 0.00000<br>153.65536<br>153.65536           | 11.745384                        | 1                                   | 1                               |
| CNO( <sup>2</sup> Π)                              | 0.00000<br>145.14571<br>145.14571           | 12.433996                        | 1                                   | 1                               |
| CF <sub>3</sub> O( <sup>2</sup> A')               | 300.31860<br>310.73048<br>326.59300         | 6.00942<br>5.80806<br>5.52596    | 1                                   | 1                               |
| CN( <sup>2</sup> Σ <sup>+</sup> )                 | 0.00000<br>31.37215<br>31.37215             | 57.526852                        | 1                                   | 1                               |
| CF <sub>2</sub> NCO( <sup>2</sup> A)              | 168.98003<br>860.74611<br>1020.81056        | 10.68020<br>2.09672<br>1.76795   | 1                                   | 1                               |
| CF <sub>2</sub> ( <sup>3</sup> B <sub>1</sub> )   | 14.49112<br>176.28439<br>190.77551          | 124.54118<br>10.23767<br>9.46003 | 2                                   | 1                               |
| CNOF( <sup>3</sup> A'')                           | 137.98591<br>157.92360<br>295.90951         | 13.07917<br>11.42794<br>6.09896  | 1                                   | 2                               |
| F <sub>2</sub> CO( <sup>3</sup> A'')              | 151.27248<br>173.35596                      | 11.93040<br>10.41061             | 1                                   | 1                               |

|                                                  |                                     |                                   |   |   |
|--------------------------------------------------|-------------------------------------|-----------------------------------|---|---|
|                                                  | 312.28608                           | 5.77913                           |   |   |
| FCN( <sup>3</sup> A')                            | 12.98325<br>146.78769<br>159.77094  | 139.00538<br>12.29491<br>11.29580 | 1 | 1 |
| CF <sub>3</sub> C( <sup>2</sup> A'')             | 290.12794<br>305.68236<br>333.83748 | 6.22050<br>5.90398<br>5.40605     | 1 | 1 |
| NO( <sup>2</sup> Π)                              | 0.00000<br>35.14144<br>35.14144     | 51.356499                         | 1 | 1 |
| CF <sub>3</sub> N( <sup>1</sup> A')              | 262.53805<br>307.66739<br>356.46665 | 6.87421<br>5.86588<br>5.06286     | 1 | 1 |
| CO( <sup>1</sup> Σ <sup>+</sup> )                | 0.00000<br>31.12996<br>31.12996     | 57.974423                         | 1 | 1 |
| CF <sub>2</sub> ( <sup>1</sup> A <sub>1</sub> )  | 20.82720<br>145.18110<br>166.00829  | 86.65311<br>12.43097<br>10.87139  | 2 | 1 |
| CNOF( <sup>1</sup> A')                           | 98.51675<br>185.80500<br>284.32176  | 18.31913<br>9.71309<br>6.34753    | 1 | 2 |
| F <sub>2</sub> CO( <sup>1</sup> A <sub>1</sub> ) | 154.31434<br>154.54982<br>308.86416 | 11.69523<br>11.67741<br>5.84316   | 2 | 1 |
| FCN( <sup>1</sup> Σ)                             | 0.00000<br>170.31936<br>170.31936   | 10.596219                         | 1 | 1 |
| IM1(CF <sub>3</sub> C(O)N)( <sup>3</sup> A'')    | 456.92196<br>715.38762<br>850.03460 | 3.94978<br>2.52275<br>2.12314     | 1 | 1 |
| IM2(CF <sub>3</sub> CNO)( <sup>3</sup> A)        | 348.06152<br>966.04496<br>994.25917 | 5.18512<br>1.86818<br>1.81516     | 1 | 1 |
| IM3(CF <sub>3</sub> OCN)( <sup>3</sup> A'')      | 357.48518<br>796.57682<br>834.11739 | 5.04844<br>2.26562<br>2.16365     | 1 | 1 |
| IM4 (F <sub>2</sub> C(O)CNF)( <sup>3</sup> A)    | 411.77376<br>675.62574<br>886.33317 | 4.38285<br>2.67121<br>2.03619     | 1 | 1 |
| IM5(F <sub>2</sub> COCNF)( <sup>3</sup> A)       | 460.28174<br>695.25179<br>852.86631 | 3.92095<br>2.59581<br>2.11609     | 1 | 1 |
| IM6(F <sub>2</sub> CC(F)NO)( <sup>3</sup> A'')   | 476.79586                           | 3.78514                           | 1 | 1 |

|                                                |                                       |                               |   |   |
|------------------------------------------------|---------------------------------------|-------------------------------|---|---|
|                                                | 717.13996<br>1193.93582               | 2.51658<br>1.51159            |   |   |
| IM7(F <sub>2</sub> CONCF)( <sup>3</sup> A)     | 437.96149<br>662.17182<br>817.50892   | 4.12078<br>2.72549<br>2.20761 | 1 | 1 |
| 1-IM1(CF <sub>3</sub> C(O)N)( <sup>1</sup> A') | 409.59507<br>788.24268<br>876.96962   | 4.40616<br>2.28958<br>2.05793 | 1 | 1 |
| 1-IM2(FOCF <sub>2</sub> CN)( <sup>1</sup> A')  | 382.94504<br>898.20829<br>962.36857   | 4.71279<br>2.00927<br>1.87531 | 1 | 1 |
| 1-IM3(CF <sub>3</sub> OCN)( <sup>1</sup> A')   | 327.88312<br>930.25796<br>940.48309   | 5.50422<br>1.94004<br>1.91895 | 1 | 1 |
| 1-IM4(CF <sub>3</sub> CNO)( <sup>1</sup> A)    | 320.50806<br>1224.61049<br>1224.69503 | 5.63088<br>1.47373<br>1.47363 | 1 | 1 |
| 1-IM5(CF <sub>3</sub> NCO)( <sup>1</sup> A')   | 322.43315<br>1053.57795<br>1056.09805 | 5.59726<br>1.71296<br>1.70888 | 1 | 1 |
| 1-IM6(F <sub>2</sub> C(N)COF)( <sup>1</sup> A) | 404.02669<br>671.56743<br>866.27953   | 4.46689<br>2.68736<br>2.08332 | 1 | 1 |
| 1-IM7(CF <sub>3</sub> NC(O))( <sup>1</sup> A)  | 365.95731<br>754.17771<br>788.84779   | 4.93156<br>2.39299<br>2.28782 | 1 | 1 |
| 1-IM8(CF <sub>3</sub> ONC)( <sup>1</sup> A')   | 329.33416<br>892.23305<br>904.65064   | 5.47997<br>2.02272<br>1.99496 | 1 | 1 |
| 1-IM9(F <sub>2</sub> CNCOF)( <sup>1</sup> A)   | 311.03297<br>1089.30136<br>1173.83375 | 5.80241<br>1.65679<br>1.53748 | 1 | 1 |
| TS1( <sup>3</sup> A'')                         | 565.61937<br>1056.95182<br>1298.94391 | 3.19073<br>1.70750<br>1.38939 | 1 | 1 |
| TS1'( <sup>3</sup> A')                         | 570.47780<br>1051.62885<br>1298.61032 | 3.16356<br>1.71614<br>1.38975 | 1 | 1 |
| TS2( <sup>3</sup> A'')                         | 478.16049<br>781.91109<br>939.33154   | 3.77434<br>2.30812<br>1.92130 | 1 | 1 |
| TS3( <sup>3</sup> A'')                         | 472.09909<br>790.78029<br>940.82061   | 3.82280<br>2.28223<br>1.91826 | 1 | 1 |

|                         |                                       |                               |   |   |
|-------------------------|---------------------------------------|-------------------------------|---|---|
| TS4( <sup>3</sup> A)    | 366.34998<br>1066.73875<br>1111.66711 | 4.92628<br>1.69183<br>1.62345 | 1 | 1 |
| TS5( <sup>3</sup> A)    | 369.90679<br>1299.74386<br>1346.91291 | 4.87891<br>1.38854<br>1.33991 | 1 | 1 |
| TS6( <sup>3</sup> A)    | 340.27897<br>1084.81923<br>1085.87758 | 5.30371<br>1.66363<br>1.66201 | 1 | 1 |
| TS7( <sup>3</sup> A')   | 513.58771<br>636.25852<br>836.11213   | 3.51399<br>2.83649<br>2.15849 | 1 | 1 |
| TS8 ( <sup>3</sup> A'') | 374.30789<br>919.10262<br>971.96441   | 4.82154<br>1.96359<br>1.85680 | 1 | 1 |
| TS9( <sup>3</sup> A)    | 469.33654<br>746.61072<br>851.87339   | 3.84530<br>2.41725<br>2.11856 | 1 | 1 |
| TS10( <sup>3</sup> A)   | 440.10426<br>792.26837<br>955.29143   | 4.10071<br>2.27794<br>1.88920 | 1 | 1 |
| TS11( <sup>3</sup> A)   | 426.95309<br>672.99342<br>865.79759   | 4.22702<br>2.68166<br>2.08448 | 1 | 1 |
| TS12( <sup>3</sup> A')  | 463.13620<br>869.99102<br>1019.51739  | 3.89678<br>2.07444<br>1.77019 | 1 | 1 |
| TS13( <sup>3</sup> A')  | 414.66477<br>1119.80995<br>1215.49595 | 4.35229<br>1.61165<br>1.48478 | 1 | 1 |
| TS14( <sup>3</sup> A)   | 478.67440<br>628.29844<br>892.18349   | 3.77029<br>2.87243<br>2.02284 | 1 | 1 |
| TS15( <sup>3</sup> A)   | 434.80443<br>659.80768<br>825.61653   | 4.15070<br>2.73525<br>2.18593 | 1 | 1 |
| 1-TS1( <sup>1</sup> A') | 411.82142<br>903.41082<br>1003.05536  | 4.38234<br>1.99770<br>1.79924 | 1 | 1 |
| 1-TS2( <sup>1</sup> A)  | 355.70412<br>915.20057<br>961.37811   | 5.07371<br>1.97196<br>1.87724 | 1 | 1 |
| 1-TS3( <sup>1</sup> A') | 454.57177<br>704.41056                | 3.97020<br>2.56206            | 1 | 1 |

|                         |                                      |                               |   |   |
|-------------------------|--------------------------------------|-------------------------------|---|---|
|                         | 839.43652                            | 2.14994                       |   |   |
| 1-TS4( <sup>1</sup> A)  | 434.61175<br>781.86364<br>836.81473  | 4.15254<br>2.30826<br>2.15668 | 1 | 1 |
| 1-TS5( <sup>1</sup> A') | 443.68815<br>668.02719<br>794.13706  | 4.06759<br>2.70160<br>2.27258 | 1 | 1 |
| 1-TS6( <sup>1</sup> A)  | 368.55201<br>811.28664<br>850.90915  | 4.89684<br>2.22454<br>2.12096 | 1 | 1 |
| 1-TS7( <sup>1</sup> A)  | 360.68466<br>779.27499<br>803.91455  | 5.00365<br>2.31592<br>2.24494 | 1 | 1 |
| 1-TS8( <sup>1</sup> A)  | 423.49529<br>672.07819<br>864.30601  | 4.26154<br>2.68531<br>2.08808 | 1 | 1 |
| 1-TS9( <sup>1</sup> A)  | 327.74821<br>948.00888<br>961.64426  | 5.50649<br>1.90372<br>1.87672 | 1 | 1 |
| 1-TS10( <sup>1</sup> A) | 428.95169<br>858.25927<br>1044.38009 | 4.20733<br>2.10279<br>1.72805 | 1 | 1 |

Table S2: The Z-matrix (Cartesian coordinates) of all species found on PESs at the B3LYP/6-311+G(d) level.

| Species                                           | Coordinates(Atom, X, Y, Z) |           |           |           |
|---------------------------------------------------|----------------------------|-----------|-----------|-----------|
| CF <sub>3</sub> CN( <sup>1</sup> A <sub>1</sub> ) | C                          | 0.000000  | 0.000000  | -0.319481 |
|                                                   | C                          | 0.000000  | 0.000000  | 1.160162  |
|                                                   | N                          | 0.000000  | 0.000000  | 2.309784  |
|                                                   | F                          | 0.000000  | 1.255138  | -0.785651 |
|                                                   | F                          | 1.086982  | -0.627569 | -0.785651 |
|                                                   | F                          | -1.086982 | -0.627569 | -0.785651 |
| CF <sub>2</sub> CN( <sup>2</sup> A')              | C                          | 0.176762  | -0.330156 | 0.000000  |
|                                                   | C                          | -0.199040 | 0.997971  | 0.000000  |
|                                                   | N                          | -0.435434 | 2.139763  | 0.000000  |
|                                                   | F                          | 0.176762  | -1.054735 | 1.099584  |
|                                                   | F                          | 0.176762  | -1.054735 | -1.099584 |
| OF( <sup>2</sup> Π)                               | O                          | 0.000000  | 0.000000  | -0.716233 |
|                                                   | F                          | 0.000000  | 0.000000  | 0.636652  |
| CF <sub>3</sub> ( <sup>2</sup> A <sub>1</sub> )   | C                          | 0.000000  | 0.000000  | 0.327418  |
|                                                   | F                          | 0.000000  | 1.262025  | -0.072760 |
|                                                   | F                          | -1.092946 | -0.631013 | -0.072760 |
|                                                   | F                          | 1.092946  | -0.631013 | -0.072760 |
| NCO( <sup>2</sup> Π)                              | N                          | 0.000000  | 0.000000  | -1.263691 |
|                                                   | C                          | 0.000000  | 0.000000  | -0.040546 |
|                                                   | O                          | 0.000000  | 0.000000  | 1.136139  |
| CNO( <sup>2</sup> Π)                              | C                          | 0.000000  | 0.000000  | -1.326595 |
|                                                   | N                          | 0.000000  | 0.000000  | -0.119212 |
|                                                   | O                          | 0.000000  | 0.000000  | 1.099256  |
| CF <sub>3</sub> O( <sup>2</sup> A')               | C                          | -0.028349 | 0.031199  | 0.000000  |
|                                                   | O                          | -0.447525 | 1.317536  | 0.000000  |
|                                                   | F                          | 1.311750  | 0.089171  | 0.000000  |
|                                                   | F                          | -0.447525 | -0.640557 | 1.079395  |
|                                                   | F                          | -0.447525 | -0.640557 | -1.079395 |
| CN( <sup>2</sup> Σ <sup>+</sup> )                 | C                          | 0.000000  | 0.000000  | -0.627824 |
|                                                   | N                          | 0.000000  | 0.000000  | 0.538135  |
| CF <sub>2</sub> NCO( <sup>2</sup> A)              | C                          | 0.874937  | -0.020827 | 0.289090  |
|                                                   | C                          | -1.491616 | -0.167517 | -0.014493 |
|                                                   | N                          | -0.337415 | -0.538641 | -0.080834 |
|                                                   | O                          | -2.625789 | 0.079483  | 0.006625  |
|                                                   | F                          | 1.099937  | 1.255673  | -0.064055 |
|                                                   | F                          | 1.907650  | -0.781818 | -0.062028 |
| CF <sub>2</sub> ( <sup>3</sup> B <sub>1</sub> )   | C                          | 0.000000  | 0.000000  | 0.500288  |
|                                                   | F                          | 0.000000  | 1.139815  | -0.166763 |
|                                                   | F                          | 0.000000  | -1.139815 | -0.166763 |

|                                                  |   |           |           |           |
|--------------------------------------------------|---|-----------|-----------|-----------|
| CNOF( <sup>3</sup> A'')                          | C | 0.000000  | 0.108847  | 0.000000  |
|                                                  | N | 1.363364  | 0.312686  | 0.000000  |
|                                                  | O | -0.812477 | 0.986882  | 0.000000  |
|                                                  | F | -0.338193 | -1.192993 | 0.000000  |
| F <sub>2</sub> CO( <sup>3</sup> A'')             | C | -0.266859 | 0.214018  | 0.000000  |
|                                                  | O | 0.800576  | 1.038114  | 0.000000  |
|                                                  | F | -0.266859 | -0.532723 | 1.110008  |
|                                                  | F | -0.266859 | -0.532723 | -1.110008 |
| FCN( <sup>3</sup> A')                            | C | 0.000000  | 0.485424  | 0.000000  |
|                                                  | N | 1.223177  | 0.137740  | 0.000000  |
|                                                  | F | -0.951360 | -0.430747 | 0.000000  |
| CF <sub>3</sub> C( <sup>2</sup> A'')             | C | -0.068123 | 0.073430  | 0.000000  |
|                                                  | F | 1.286050  | 0.157667  | 0.000000  |
|                                                  | F | -0.465238 | -0.615830 | 1.082977  |
|                                                  | F | -0.465238 | -0.615830 | -1.082977 |
|                                                  | C | -0.465238 | 1.537561  | 0.000000  |
| NO( <sup>2</sup> Π)                              | N | 0.000000  | 0.000000  | -0.612284 |
|                                                  | O | 0.000000  | 0.000000  | 0.535749  |
| CF <sub>3</sub> N( <sup>1</sup> A')              | C | 0.094448  | 0.094246  | 0.000000  |
|                                                  | F | -0.374878 | -1.224453 | 0.000000  |
|                                                  | F | -0.374878 | 0.742554  | 1.071095  |
|                                                  | F | -0.374878 | 0.742554  | -1.071095 |
|                                                  | N | 1.365001  | -0.415911 | 0.000000  |
| CO( <sup>1</sup> Σ <sup>+</sup> )                | O | 0.000000  | 0.000000  | 0.483250  |
|                                                  | C | 0.000000  | 0.000000  | -0.644333 |
| CF <sub>2</sub> ( <sup>1</sup> A <sub>1</sub> )  | C | 0.000000  | 0.000000  | 0.599770  |
|                                                  | F | 0.000000  | 1.034386  | -0.199923 |
|                                                  | F | 0.000000  | -1.034386 | -0.199923 |
| CNOF( <sup>1</sup> A')                           | C | 0.000000  | 0.051095  | 0.000000  |
|                                                  | N | -1.075767 | 0.716862  | 0.000000  |
|                                                  | O | -0.474010 | -1.107525 | 0.000000  |
|                                                  | F | 1.258049  | 0.392844  | 0.000000  |
| F <sub>2</sub> CO( <sup>1</sup> A <sub>1</sub> ) | C | 0.000000  | 0.000000  | 0.146461  |
|                                                  | O | 0.000000  | 0.000000  | 1.317347  |
|                                                  | F | 0.000000  | 1.066426  | -0.634308 |
|                                                  | F | 0.000000  | -1.066426 | -0.634308 |
| FCN( <sup>1</sup> Σ)                             | C | 0.000000  | 0.000000  | -0.151259 |
|                                                  | N | 0.000000  | 0.000000  | -1.304204 |
|                                                  | F | 0.000000  | 0.000000  | 1.115220  |
| IM1(CF <sub>3</sub> C(O)N)( <sup>3</sup> A'')    | C | -0.106498 | 0.539879  | 0.000000  |
|                                                  | C | 0.226518  | -0.980667 | 0.000000  |
|                                                  | N | -0.830979 | -1.847382 | 0.000000  |
|                                                  | O | 1.376941  | -1.393595 | 0.000000  |
|                                                  | F | 1.004313  | 1.269994  | 0.000000  |



|                                                |   |           |           |           |
|------------------------------------------------|---|-----------|-----------|-----------|
|                                                | F | -0.830979 | 0.849734  | 1.089748  |
|                                                | F | -0.830979 | 0.849734  | -1.089748 |
| IM2(CF <sub>3</sub> CNO)( <sup>3</sup> A)      | C | -0.712376 | -0.024768 | 0.000363  |
|                                                | F | -0.416108 | 1.253200  | -0.304252 |
|                                                | C | 0.513103  | -0.890282 | 0.013261  |
|                                                | N | 1.749608  | -0.655855 | 0.006956  |
|                                                | O | 2.361917  | 0.428282  | -0.000720 |
|                                                | F | -1.590283 | -0.478665 | -0.908918 |
|                                                | F | -1.321049 | -0.035087 | 1.199317  |
| IM3(CF <sub>3</sub> OCN)( <sup>3</sup> A'')    | C | 0.467637  | 0.391832  | 0.000000  |
|                                                | O | -0.965297 | 0.472486  | 0.000000  |
|                                                | C | -1.720640 | -0.624320 | 0.000000  |
|                                                | N | -1.289327 | -1.850655 | 0.000000  |
|                                                | F | 0.898729  | 1.641088  | 0.000000  |
|                                                | F | 0.898729  | -0.233343 | 1.085800  |
|                                                | F | 0.898729  | -0.233343 | -1.085800 |
| IM4 (F <sub>2</sub> C(O)CNF)( <sup>3</sup> A)  | C | -0.674596 | -0.001497 | 0.011012  |
|                                                | C | 0.801344  | 0.112650  | -0.039344 |
|                                                | N | 1.479007  | 1.284045  | -0.322211 |
|                                                | O | 0.010191  | 0.098746  | 1.191129  |
|                                                | F | 1.523108  | -1.003539 | -0.245241 |
|                                                | F | -1.488735 | 1.002901  | -0.303747 |
|                                                | F | -1.278269 | -1.159941 | -0.240295 |
| IM5(F <sub>2</sub> COCNF)( <sup>3</sup> A)     | C | 0.613293  | -0.015159 | 0.063245  |
|                                                | C | -0.923252 | -0.153450 | -0.071458 |
|                                                | N | -1.483198 | -1.279164 | -0.098622 |
|                                                | O | 0.779716  | -0.468976 | 1.298929  |
|                                                | F | -1.589359 | 0.991722  | -0.083890 |
|                                                | F | 1.259163  | -0.739848 | -0.883432 |
|                                                | F | 0.997353  | 1.272305  | -0.105100 |
| IM6(F <sub>2</sub> CC(F)NO)( <sup>3</sup> A'') | C | -0.605092 | -0.596856 | 0.000000  |
|                                                | F | -1.911511 | -0.752795 | 0.000000  |
|                                                | C | 0.000000  | 0.622424  | 0.000000  |
|                                                | N | 1.315665  | 0.874076  | 0.000000  |
|                                                | O | 2.258088  | 0.085606  | 0.000000  |
|                                                | F | -0.772882 | 1.713466  | 0.000000  |
|                                                | F | 0.057304  | -1.733648 | 0.000000  |
| IM7(F <sub>2</sub> CONCF)( <sup>3</sup> A)     | C | -0.564481 | -0.092855 | 0.028323  |
|                                                | F | -1.551993 | 0.050391  | 0.913769  |
|                                                | C | 0.859829  | -0.017663 | 0.550410  |
|                                                | N | 0.986063  | 1.312157  | -0.086935 |
|                                                | O | -0.289477 | 1.132277  | -0.660099 |
|                                                | F | 1.737154  | -0.931330 | 0.165398  |
|                                                | F | -0.891686 | -1.072417 | -0.810618 |

|                                                |   |           |           |           |
|------------------------------------------------|---|-----------|-----------|-----------|
| 1-IM1(CF <sub>3</sub> C(O)N)( <sup>1</sup> A') | C | -0.037512 | 0.608460  | 0.000000  |
|                                                | C | 0.144713  | -0.897142 | 0.000000  |
|                                                | N | 1.091858  | -1.719552 | 0.000000  |
|                                                | O | -0.718854 | -1.857562 | 0.000000  |
|                                                | F | 1.155999  | 1.210024  | 0.000000  |
|                                                | F | -0.718854 | 0.985513  | 1.087366  |
|                                                | F | -0.718854 | 0.985513  | -1.087366 |
| 1-IM2(FOCF <sub>2</sub> CN)( <sup>1</sup> A')  | C | -0.015433 | 0.222302  | 0.000000  |
|                                                | C | -1.489832 | 0.111725  | 0.000000  |
|                                                | N | -2.637957 | 0.045641  | 0.000000  |
|                                                | O | 0.417673  | -1.100855 | 0.000000  |
|                                                | F | 1.848643  | -1.053497 | 0.000000  |
|                                                | F | 0.417673  | 0.886926  | 1.083830  |
|                                                | F | 0.417673  | 0.886926  | -1.083830 |
| 1-IM3(CF <sub>3</sub> OCN)( <sup>1</sup> A')   | C | -0.571929 | 0.366325  | 0.000000  |
|                                                | O | 0.830112  | 0.448913  | 0.000000  |
|                                                | C | 1.497029  | -0.671384 | 0.000000  |
|                                                | N | 2.144784  | -1.626077 | 0.000000  |
|                                                | F | -1.007592 | -0.270750 | 1.081913  |
|                                                | F | -1.007592 | -0.270750 | -1.081913 |
|                                                | F | -1.007592 | 1.610566  | 0.000000  |
| 1-IM4(CF <sub>3</sub> CNO)( <sup>1</sup> A)    | C | -0.822769 | 0.001867  | 0.003002  |
|                                                | F | -1.253199 | -0.994161 | -0.793528 |
|                                                | C | 0.634541  | 0.037967  | 0.060238  |
|                                                | N | 1.793775  | 0.011149  | 0.017723  |
|                                                | O | 2.985811  | -0.004866 | -0.007687 |
|                                                | F | -1.352055 | -0.192679 | 1.224299  |
|                                                | F | -1.318472 | 1.155937  | -0.479882 |
| 1-IM5(CF <sub>3</sub> NCO)( <sup>1</sup> A')   | C | -0.645014 | 0.331278  | 0.000000  |
|                                                | C | 1.580918  | -0.518385 | 0.000000  |
|                                                | N | 0.755952  | 0.374598  | 0.000000  |
|                                                | O | 2.459673  | -1.271365 | 0.000000  |
|                                                | F | -1.132759 | 1.573901  | 0.000000  |
|                                                | F | -1.132759 | -0.305207 | 1.085747  |
|                                                | F | -1.132759 | -0.305207 | -1.085747 |
| 1-IM6(F <sub>2</sub> C(N)COF)( <sup>1</sup> A) | C | 0.681406  | 0.053557  | -0.015902 |
|                                                | C | -0.765274 | 0.035857  | -0.180911 |
|                                                | N | -0.205892 | -0.413719 | 1.092452  |
|                                                | O | -1.032394 | -1.259111 | 0.047789  |
|                                                | F | 1.279533  | 1.204416  | 0.281593  |
|                                                | F | -1.672263 | 0.950058  | -0.426680 |
|                                                | F | 1.526464  | -0.773092 | -0.615870 |
| 1-IM7(CF <sub>3</sub> NC(O))( <sup>1</sup> A)  | C | -0.570489 | -0.000583 | -0.013954 |
|                                                | C | 1.787114  | -0.711928 | 0.090669  |

|                                              |   |           |           |           |
|----------------------------------------------|---|-----------|-----------|-----------|
|                                              | N | 0.675673  | -0.217227 | -0.736555 |
|                                              | O | 1.812805  | 0.548556  | -0.047392 |
|                                              | F | -1.364170 | -1.019727 | -0.352098 |
|                                              | F | -1.136528 | 1.141597  | -0.405505 |
|                                              | F | -0.447291 | 0.034486  | 1.321462  |
| 1-IM8(CF <sub>3</sub> ONC)( <sup>1</sup> A') | C | -0.553250 | 0.353216  | 0.000000  |
|                                              | O | 0.852610  | 0.463726  | 0.000000  |
|                                              | C | 2.160060  | -1.665167 | 0.000000  |
|                                              | N | 1.449176  | -0.727373 | 0.000000  |
|                                              | F | -0.985406 | -0.286004 | 1.080650  |
|                                              | F | -0.985406 | -0.286004 | -1.080650 |
|                                              | F | -0.985406 | 1.600175  | 0.000000  |
| 1-IM9(F <sub>2</sub> CNCOF)( <sup>1</sup> A) | C | 1.085652  | -0.064318 | -0.032338 |
|                                              | C | -1.224137 | -0.007517 | -0.180759 |
|                                              | N | 0.022534  | -0.568625 | -0.423103 |
|                                              | O | -1.706100 | 0.948477  | -0.681308 |
|                                              | F | 2.257418  | -0.552028 | -0.342550 |
|                                              | F | -1.902634 | -0.792803 | 0.679055  |
|                                              | F | 1.236546  | 0.991895  | 0.740247  |
| TS1( <sup>3</sup> A'')                       | C | -0.739159 | -0.179827 | 0.000000  |
|                                              | C | -0.922148 | 1.216627  | 0.000000  |
|                                              | N | -0.994567 | 2.372647  | 0.000000  |
|                                              | F | 1.344740  | -0.294639 | 0.000000  |
|                                              | F | -0.994567 | -0.854057 | 1.092031  |
|                                              | F | -0.994567 | -0.854057 | -1.092031 |
|                                              | O | 2.841171  | -0.600570 | 0.000000  |
| TS1'( <sup>3</sup> A')                       | C | -0.741080 | -0.193271 | 0.000000  |
|                                              | C | -0.925680 | 1.203271  | 0.000000  |
|                                              | N | -0.996789 | 2.359275  | 0.000000  |
|                                              | F | 1.344018  | -0.296678 | 0.000000  |
|                                              | F | -0.996789 | -0.867669 | 1.091810  |
|                                              | F | -0.996789 | -0.867669 | -1.091810 |
|                                              | O | 2.853016  | -0.535847 | 0.000000  |
| TS2( <sup>3</sup> A'')                       | C | 0.072039  | 0.595245  | 0.000000  |
|                                              | C | -0.652498 | -0.713527 | 0.000000  |
|                                              | N | -1.554287 | -1.456117 | 0.000000  |
|                                              | O | 0.837856  | -2.029764 | 0.000000  |
|                                              | F | -0.824611 | 1.590633  | 0.000000  |
|                                              | F | 0.837856  | 0.712496  | 1.087149  |
|                                              | F | 0.837856  | 0.712496  | -1.087149 |
| TS3( <sup>3</sup> A'')                       | C | -0.685586 | 0.010524  | 0.000000  |
|                                              | C | 1.355163  | 0.027566  | -0.000002 |
|                                              | N | 1.728863  | 1.211796  | 0.000000  |
|                                              | O | 1.606068  | -1.159791 | -0.000001 |

|                         |   |           |           |           |
|-------------------------|---|-----------|-----------|-----------|
|                         | F | -1.092469 | -0.607284 | -1.089370 |
|                         | F | -1.033740 | 1.277553  | -0.000022 |
|                         | F | -1.092463 | -0.607246 | 1.089394  |
| TS4( <sup>3</sup> A)    | C | -0.767291 | 0.001378  | -0.000148 |
|                         | C | 0.535078  | -0.707476 | -0.004194 |
|                         | N | 1.712430  | -0.834794 | -0.003909 |
|                         | O | 2.657823  | 0.500096  | 0.001034  |
|                         | F | -1.431188 | -0.258160 | 1.133873  |
|                         | F | -1.516846 | -0.395851 | -1.036636 |
|                         | F | -0.591557 | 1.329497  | -0.092221 |
| TS5( <sup>3</sup> A)    | C | 0.974374  | 0.008622  | -0.002937 |
|                         | C | -0.973061 | -1.093939 | -0.024760 |
|                         | N | -1.966276 | -0.385875 | -0.011907 |
|                         | O | -2.838711 | 0.464911  | 0.004945  |
|                         | F | 1.509281  | -0.177138 | 1.198308  |
|                         | F | 1.743047  | -0.524045 | -0.942289 |
|                         | F | 0.799421  | 1.311599  | -0.232688 |
| TS6( <sup>3</sup> A)    | C | -0.409972 | 0.020524  | -0.000091 |
|                         | C | 1.790056  | -0.089368 | 0.000486  |
|                         | N | 2.950957  | 0.008419  | 0.000069  |
|                         | F | -0.344827 | 1.310765  | -0.013130 |
|                         | F | -0.408758 | -0.640550 | -1.111425 |
|                         | F | -0.409280 | -0.617764 | 1.124520  |
|                         | O | -2.308927 | -0.014740 | -0.000317 |
| TS7( <sup>3</sup> A')   | C | 0.311515  | 0.492770  | 0.000000  |
|                         | C | -1.036993 | -0.190880 | 0.000000  |
|                         | N | -1.460313 | 0.993097  | 0.000000  |
|                         | O | -1.211180 | -1.432526 | 0.000000  |
|                         | F | 0.898685  | -1.469859 | 0.000000  |
|                         | F | 0.898685  | 0.884773  | 1.075210  |
|                         | F | 0.898685  | 0.884773  | -1.075210 |
| TS8 ( <sup>3</sup> A'') | C | -0.639492 | 0.370960  | 0.000000  |
|                         | O | 1.112062  | 0.479889  | 0.000000  |
|                         | C | 1.813974  | -0.549597 | 0.000000  |
|                         | N | 1.686495  | -1.822117 | 0.000000  |
|                         | F | -1.027735 | -0.257147 | 1.088345  |
|                         | F | -1.027735 | -0.257147 | -1.088345 |
|                         | F | -1.027735 | 1.624020  | 0.000000  |
| TS9( <sup>3</sup> A)    | C | 0.769780  | 0.047331  | -0.036850 |
|                         | C | -0.778220 | 0.010984  | -0.177907 |
|                         | N | -1.349072 | 1.315810  | -0.191750 |
|                         | O | -1.153989 | -0.812845 | -1.023532 |
|                         | F | -0.868384 | -0.424391 | 1.322050  |
|                         | F | 1.491122  | 1.095133  | -0.047945 |

|                         |   |           |           |           |
|-------------------------|---|-----------|-----------|-----------|
|                         | F | 1.457936  | -1.010498 | -0.071989 |
| TS10( <sup>3</sup> A)   | C | 0.861187  | 0.011516  | -0.310338 |
|                         | C | -0.901757 | -0.112085 | 0.113815  |
|                         | N | -1.363974 | -1.222047 | -0.642058 |
|                         | O | -0.691563 | -0.182456 | 1.327644  |
|                         | F | -1.415346 | 1.054451  | -0.418293 |
|                         | F | 1.647601  | -0.983822 | -0.096896 |
|                         | F | 1.470383  | 1.109081  | -0.034545 |
| TS11( <sup>3</sup> A)   | C | 0.647870  | -0.001911 | 0.052704  |
|                         | C | -0.834222 | -0.123937 | -0.123840 |
|                         | N | -1.467994 | -1.277223 | -0.264062 |
|                         | O | 0.158679  | -0.157546 | 1.278975  |
|                         | F | -1.527144 | 1.001503  | -0.217640 |
|                         | F | 1.447437  | -0.966940 | -0.424623 |
|                         | F | 1.204666  | 1.182772  | -0.241798 |
| TS12( <sup>3</sup> A')  | C | 0.009757  | 0.986269  | 0.000000  |
|                         | C | -0.281724 | -1.140105 | 0.000000  |
|                         | N | -1.467789 | -1.555660 | 0.000000  |
|                         | O | -1.175446 | 1.173222  | 0.000000  |
|                         | F | 0.789255  | -1.903027 | 0.000000  |
|                         | F | 0.789255  | 1.086339  | 1.074997  |
|                         | F | 0.789255  | 1.086339  | -1.074997 |
| TS13( <sup>3</sup> A')  | C | 0.326075  | -0.807572 | 0.000000  |
|                         | F | 0.506488  | -1.512546 | 1.084160  |
|                         | C | 0.179854  | 0.516436  | 0.000000  |
|                         | N | -0.105646 | 1.714677  | 0.000000  |
|                         | O | 0.506488  | 2.775162  | 0.000000  |
|                         | F | -1.718305 | -0.581265 | 0.000000  |
|                         | F | 0.506488  | -1.512546 | -1.084160 |
| TS14( <sup>3</sup> A)   | C | -0.638773 | 0.128809  | -0.052585 |
|                         | F | -1.546009 | -0.540254 | -0.703829 |
|                         | C | 0.736992  | 0.178917  | -0.492591 |
|                         | N | 1.244167  | -1.099674 | -0.129476 |
|                         | O | 0.268763  | -1.317970 | 0.789179  |
|                         | F | 1.449621  | 1.252271  | -0.146001 |
|                         | F | -1.175677 | 1.109664  | 0.612492  |
| TS15( <sup>3</sup> A)   | C | -0.570751 | 0.068645  | -0.006896 |
|                         | F | -1.521869 | -0.337924 | -0.861323 |
|                         | C | 0.865090  | -0.064739 | -0.488664 |
|                         | N | 1.037754  | -1.316442 | -0.005040 |
|                         | O | -0.298852 | -0.887392 | 0.985075  |
|                         | F | 1.728362  | 0.899577  | -0.173513 |
|                         | F | -0.944215 | 1.248435  | 0.493507  |
| 1-TS1( <sup>1</sup> A') | C | -0.137550 | 0.391352  | 0.000000  |

|                         |   |           |           |           |
|-------------------------|---|-----------|-----------|-----------|
|                         | C | -0.593820 | -1.436927 | 0.000000  |
|                         | N | -1.106750 | -2.479365 | 0.000000  |
|                         | O | 0.835210  | -0.433123 | 0.000000  |
|                         | F | 1.793617  | 1.147821  | 0.000000  |
|                         | F | -0.593820 | 0.931311  | 1.072539  |
|                         | F | -0.593820 | 0.931311  | -1.072539 |
| 1-TS2( <sup>1</sup> A)  | C | 0.693898  | -0.022509 | -0.027991 |
|                         | C | -0.611745 | 0.429647  | -0.650262 |
|                         | N | -1.670529 | 0.650824  | 0.026982  |
|                         | O | -2.309219 | -0.473924 | -0.052868 |
|                         | F | 0.529416  | -0.830778 | 1.020271  |
|                         | F | 1.293725  | 1.114937  | 0.370448  |
|                         | F | 1.474030  | -0.640516 | -0.912543 |
| 1-TS3( <sup>1</sup> A') | C | -0.069844 | 0.553500  | 0.000000  |
|                         | C | 0.165883  | -1.054452 | 0.000000  |
|                         | N | 1.424834  | -1.274790 | 0.000000  |
|                         | O | -0.774957 | -1.847519 | 0.000000  |
|                         | F | 1.066534  | 1.263842  | 0.000000  |
|                         | F | -0.774957 | 0.851934  | 1.085123  |
|                         | F | -0.774957 | 0.851934  | -1.085123 |
| 1-TS4( <sup>1</sup> A)  | C | 0.750137  | 0.117219  | -0.126501 |
|                         | C | -0.693557 | -0.046229 | -0.079741 |
|                         | N | -1.505331 | -0.358153 | -1.045837 |
|                         | O | -1.601319 | 0.872920  | 0.130817  |
|                         | F | 1.526484  | -0.744400 | -0.646449 |
|                         | F | -0.315572 | -0.969675 | 1.214827  |
|                         | F | 1.345577  | 1.169384  | 0.266262  |
| 1-TS5( <sup>1</sup> A') | C | -0.537689 | 0.137490  | 0.000000  |
|                         | C | 1.556167  | 1.076559  | 0.000000  |
|                         | N | 1.120070  | -0.103728 | 0.000000  |
|                         | O | 1.451741  | -1.310589 | 0.000000  |
|                         | F | -0.946862 | 1.396238  | 0.000000  |
|                         | F | -0.946862 | -0.479979 | 1.081778  |
|                         | F | -0.946862 | -0.479979 | -1.081778 |
| 1-TS6( <sup>1</sup> A)  | C | -0.586041 | -0.008632 | -0.012100 |
|                         | C | 1.928635  | -0.626800 | 0.180431  |
|                         | N | 0.458870  | -0.811781 | -0.545887 |
|                         | O | 1.938643  | 0.486410  | -0.153086 |
|                         | F | -1.657595 | -0.792854 | -0.257368 |
|                         | F | -0.794150 | 1.179251  | -0.608637 |
|                         | F | -0.523454 | 0.236245  | 1.314440  |
| 1-TS7( <sup>1</sup> A)  | C | 0.585893  | -0.006019 | -0.004421 |
|                         | O | -0.572638 | 0.084954  | 0.780887  |
|                         | C | -1.855719 | 0.675007  | -0.024811 |

|                         |   |           |           |           |
|-------------------------|---|-----------|-----------|-----------|
|                         | N | -2.002489 | -0.540959 | -0.011429 |
|                         | F | 0.765340  | 1.081202  | -0.748051 |
|                         | F | 0.574949  | -1.071940 | -0.795515 |
|                         | F | 1.572765  | -0.110023 | 0.877821  |
| 1-TS8( <sup>1</sup> A)  | C | 0.670275  | -0.046107 | 0.074463  |
|                         | C | -0.814983 | -0.036049 | -0.188089 |
|                         | N | 0.052540  | -0.583808 | 1.192785  |
|                         | O | -1.368191 | -1.132682 | -0.090535 |
|                         | F | 1.208802  | 1.183318  | 0.231990  |
|                         | F | -1.461250 | 1.101881  | -0.319813 |
|                         | F | 1.524226  | -0.769527 | -0.683672 |
| 1-TS9( <sup>1</sup> A)  | C | 1.202882  | -0.360306 | -0.029561 |
|                         | C | -1.034692 | -0.036032 | -0.113273 |
|                         | N | 0.361203  | -1.189069 | -0.050977 |
|                         | O | -1.657493 | -0.038472 | -1.096636 |
|                         | F | 2.364457  | 0.116985  | -0.011282 |
|                         | F | -1.430594 | -0.065242 | 1.137127  |
|                         | F | 0.146402  | 1.171511  | -0.016185 |
| 1-TS10( <sup>1</sup> A) | C | 0.970595  | 0.109044  | -0.299799 |
|                         | C | -1.004542 | 0.069727  | 0.036672  |
|                         | N | -0.910686 | -0.356095 | 1.251630  |
|                         | O | -1.384296 | -1.101795 | -0.310558 |
|                         | F | 1.732529  | 0.950379  | 0.337742  |
|                         | F | -1.364799 | 1.208741  | -0.509721 |
|                         | F | 1.593699  | -1.021965 | -0.350041 |

Table S3: The harmonic vibrational frequencies of all species found on PESs at the B3LYP/6-311+G(d) level. The values in parentheses and *italics* are experimental data.

"i" stands for imaginary frequency.

| Species                                           | Frequencies(cm <sup>-1</sup> )                                                                                                                               |
|---------------------------------------------------|--------------------------------------------------------------------------------------------------------------------------------------------------------------|
| CF <sub>3</sub> CN( <sup>1</sup> A <sub>1</sub> ) | 193( <i>196</i> ), 462( <i>463</i> ), 518( <i>522</i> ), 622( <i>618</i> ), 802( <i>802</i> ), 1167( <i>1214</i> ), 1219( <i>1227</i> ), 2385( <i>2275</i> ) |
| CF <sub>2</sub> CN( <sup>2</sup> A')              | 151, 196, 384, 485, 595, 786, 1296, 1408, 2189                                                                                                               |
| OF( <sup>2</sup> Π)                               | 1092( <i>1029</i> )                                                                                                                                          |
| CF <sub>3</sub> ( <sup>2</sup> A <sub>1</sub> )   | 503( <i>509</i> ), 691( <i>701</i> ), 1062( <i>1089</i> ), 1222( <i>1260</i> )                                                                               |
| NCO( <sup>2</sup> Π)                              | 502, 585, 1297, 1996                                                                                                                                         |
| CNO( <sup>2</sup> Π)                              | 315, 401, 1196, 1935                                                                                                                                         |
| CF <sub>3</sub> O( <sup>2</sup> A')               | 259, 403, 569, 586, 609, 883, 1135, 1174, 1238                                                                                                               |
| CN( <sup>2</sup> Σ <sup>+</sup> )                 | 2147( <i>2069</i> )                                                                                                                                          |
| CF <sub>2</sub> NCO( <sup>2</sup> A)              | 75, 139, 448, 488, 557, 604, 663, 864, 1154, 1207, 1517, 2367                                                                                                |
| CF <sub>2</sub> ( <sup>3</sup> B <sub>1</sub> )   | 509( <i>667</i> ), 1119( <i>1114</i> ), 1279( <i>1225</i> )                                                                                                  |
| CNOF( <sup>3</sup> A'')                           | 430, 586, 654, 880, 1182, 1686                                                                                                                               |
| F <sub>2</sub> CO( <sup>3</sup> A'')              | 339, 463, 668, 1036, 1127, 1206                                                                                                                              |
| FCN( <sup>3</sup> A')                             | 559, 1081, 1606                                                                                                                                              |
| CF <sub>3</sub> C( <sup>2</sup> A'')              | 262, 294, 519, 520, 573, 820, 1089, 1120, 1252                                                                                                               |
| NO( <sup>2</sup> Π)                               | 1980( <i>1904</i> )                                                                                                                                          |
| CF <sub>3</sub> N( <sup>1</sup> A')               | 269, 319, 533, 563, 593, 875, 970, 1134, 1347                                                                                                                |
| CO( <sup>1</sup> Σ <sup>+</sup> )                 | 2213( <i>2170</i> )                                                                                                                                          |
| CF <sub>2</sub> ( <sup>1</sup> A <sub>1</sub> )   | 667, 1087, 1210                                                                                                                                              |
| CNOF( <sup>1</sup> A')                            | 375, 525, 646, 960, 1479, 1748                                                                                                                               |
| F <sub>2</sub> CO( <sup>1</sup> A <sub>1</sub> )  | 576( <i>584</i> ), 615( <i>626</i> ), 772( <i>774</i> ), 956( <i>965</i> ), 1202( <i>1249</i> ), 1974( <i>1928</i> )                                         |
| FCN( <sup>1</sup> Σ)                              | 486( <i>451</i> ), 1086( <i>1060</i> ), 2413( <i>2317</i> )                                                                                                  |
| IM1(CF <sub>3</sub> C(O)N)( <sup>3</sup> A'')     | 25, 220, 229, 353, 419, 502, 560, 605, 688, 771, 1094, 1143, 1188, 1269, 1546                                                                                |
| IM2(CF <sub>3</sub> CNO)( <sup>3</sup> A)         | 3, 152, 226, 325, 444, 526, 539, 585, 728, 814, 1135, 1140, 1147, 1274, 1693                                                                                 |
| IM3 (CF <sub>3</sub> OCN)( <sup>3</sup> A'')      | 79, 184, 330, 359, 512, 529, 554, 685, 745, 815, 1004, 1130, 1252, 1266, 1399                                                                                |
| IM4(F <sub>2</sub> C(O)CNF)( <sup>3</sup> A)      | 188, 211, 300, 426, 488, 514, 545, 653, 667, 786, 1014, 1054, 1208, 1223, 1418                                                                               |
| IM5(F <sub>2</sub> COCNF)( <sup>3</sup> A)        | 51, 214, 225, 347, 379, 496, 559, 602, 660, 791, 1019, 1110, 1149, 1239, 1635                                                                                |
| IM6(F <sub>2</sub> CC(F)NO)( <sup>3</sup> A'')    | 103, 166, 274, 289, 330, 427, 488, 527, 613, 765, 1107, 1262, 1329, 1535, 1636                                                                               |



|                                                |                                                                                          |
|------------------------------------------------|------------------------------------------------------------------------------------------|
| IM7(F <sub>2</sub> CONCF)( <sup>3</sup> A)     | 124, 200, 330, 420, 473, 545, 620, 736, 877, 937, 998, 1098, 1190, 1220, 1365            |
| 1-IM1(CF <sub>3</sub> C(O)N)( <sup>1</sup> A') | 42, 191, 206, 347, 434, 487, 551, 588, 667, 784, 1172, 1191, 1209, 1335, 1815            |
| 1-IM2(FOCF <sub>2</sub> CN)( <sup>1</sup> A')  | 127, 154, 196, 278, 464, 482, 513, 608, 611, 842, 932, 1115, 1137, 1219, 2381            |
| 1-IM3(CF <sub>3</sub> OCN)( <sup>1</sup> A')   | 63, 154, 395, 402, 485, 501, 571, 603, 707, 851, 1110, 1150, 1218, 1282, 2383            |
| 1-IM4(CF <sub>3</sub> CNO)( <sup>1</sup> A)    | 6, 25, 398, 400, 454, 534, 536, 581, 583, 770, 1128, 1130, 1132, 1509, 2456              |
| 1-IM5(CF <sub>3</sub> NCO)( <sup>1</sup> A')   | 30, 124, 405, 414, 531, 581, 585, 617, 695, 825, 1133, 1141, 1194, 1506, 2369            |
| 1-IM6(F <sub>2</sub> C(N)COF)( <sup>1</sup> A) | 211, 238, 344, 447, 477, 576, 611, 656, 685, 802, 1000, 1119, 1257, 1361, 1578           |
| 1-IM7(CF <sub>3</sub> NC(O))( <sup>1</sup> A)  | 56, 244, 264, 389, 436, 531, 587, 645, 721, 781, 891, 1159, 1197, 1214, 1505             |
| 1-IM8(CF <sub>3</sub> ONC)( <sup>1</sup> A')   | 82, 125, 265, 319, 427, 429, 566, 597, 691, 854, 1021, 1129, 1220, 1282, 2189            |
| 1-IM9(F <sub>2</sub> CNCOF)( <sup>1</sup> A)   | 44, 146, 147, 436, 551, 593, 655, 718, 779, 880, 1002, 1232, 1292, 1866, 1903            |
| TS1( <sup>3</sup> A'')                         | 682 <i>i</i> , 66, 94, 151, 182, 228, 233, 375, 494, 571, 591, 793, 1306, 1352, 2274     |
| TS1'( <sup>3</sup> A')                         | 681 <i>i</i> , 68, 69, 118, 168, 201, 238, 377, 494, 572, 589, 793, 1297, 1352, 2276     |
| TS2( <sup>3</sup> A'')                         | 374 <i>i</i> , 57, 155, 199, 269, 410, 473, 529, 579, 628, 801, 1169, 1178, 1200, 2200   |
| TS3( <sup>3</sup> A'')                         | 353 <i>i</i> , 10, 164, 165, 292, 362, 500, 528, 529, 698, 1006, 1211, 1245, 1263, 1754  |
| TS4( <sup>3</sup> A)                           | 686 <i>i</i> , 10, 96, 214, 298, 466, 495, 520, 621, 634, 794, 1142, 1163, 1192, 2019    |
| TS5( <sup>3</sup> A)                           | 233 <i>i</i> , 10, 70, 130, 154, 307, 503, 508, 667, 791, 991, 1172, 1190, 1208, 1808    |
| TS6( <sup>3</sup> A)                           | 1596 <i>i</i> , 89, 91, 138, 149, 255, 352, 378, 446, 472, 512, 834, 1372, 1385, 2159    |
| TS7( <sup>3</sup> A')                          | 710 <i>i</i> , 86, 205, 225, 313, 340, 392, 455, 624, 641, 791, 1133, 1327, 1362, 1793   |
| TS8( <sup>3</sup> A'')                         | 634 <i>i</i> , 41, 139, 226, 269, 509, 521, 547, 729, 863, 981, 1095, 1283, 1298, 1633   |
| TS9( <sup>3</sup> A)                           | 266 <i>i</i> , 90, 196, 254, 317, 376, 462, 568, 634, 684, 732, 1037, 1339, 1425, 1469   |
| TS10( <sup>3</sup> A)                          | 377 <i>i</i> , 84, 156, 195, 281, 357, 441, 562, 638, 680, 814, 1089, 1267, 1278, 1546   |
| TS11( <sup>3</sup> A)                          | 445 <i>i</i> , 174, 206, 329, 410, 460, 523, 556, 644, 798, 1013, 1131, 1173, 1284, 1382 |

|                         |                                                                                           |
|-------------------------|-------------------------------------------------------------------------------------------|
| TS12( <sup>3</sup> A')  | 337 <i>i</i> , 32, 120, 127, 236, 364, 471, 564, 585, 591, 899, 1073, 1161, 1639, 1734    |
| TS13( <sup>3</sup> A')  | 313 <i>i</i> , 21, 108, 153, 258, 339, 354, 464, 517, 567, 787, 1228, 1298, 1562, 2017    |
| TS14( <sup>3</sup> A)   | 595 <i>i</i> , 150, 216, 272, 380, 483, 547, 580, 727, 781, 1029, 1104, 1195, 1308, 1447  |
| TS15( <sup>3</sup> A)   | 1002 <i>i</i> , 165, 208, 346, 412, 498, 561, 605, 712, 845, 1022, 1083, 1145, 1207, 1337 |
| 1-TS1( <sup>1</sup> A') | 980 <i>i</i> , 122, 123, 218, 234, 274, 370, 439, 521, 557, 583, 946, 1380, 1582, 2192    |
| 1-TS2( <sup>1</sup> A)  | 714 <i>i</i> , 71, 144, 227, 352, 431, 536, 566, 582, 795, 1101, 1134, 1176, 1201, 1466   |
| 1-TS3( <sup>1</sup> A') | 1067 <i>i</i> , 21, 186, 242, 332, 430, 505, 577, 693, 745, 1038, 1185, 1196, 1276, 1546  |
| 1-TS4( <sup>1</sup> A)  | 485 <i>i</i> , 138, 197, 282, 303, 398, 444, 554, 594, 655, 808, 1245, 1380, 1439, 1602   |
| 1-TS5( <sup>1</sup> A') | 378 <i>i</i> , 40, 252, 279, 318, 466, 516, 612, 618, 737, 997, 1089, 1267, 1272, 1679    |
| 1-TS6( <sup>1</sup> A)  | 405 <i>i</i> , 76, 164, 204, 372, 396, 455, 564, 588, 635, 856, 1119, 1128, 1203, 1865    |
| 1-TS7( <sup>1</sup> A)  | 453 <i>i</i> , 56, 208, 248, 404, 421, 536, 603, 656, 711, 884, 1121, 1220, 1244, 1778    |
| 1-TS8( <sup>1</sup> A)  | 452 <i>i</i> , 107, 223, 333, 373, 507, 526, 585, 652, 773, 884, 1094, 1156, 1375, 1576   |
| 1-TS9( <sup>1</sup> A)  | 671 <i>i</i> , 108, 242, 307, 327, 442, 471, 545, 561, 665, 697, 1042, 1110, 1984, 2190   |
| 1-TS10( <sup>1</sup> A) | 394 <i>i</i> , 80, 132, 164, 293, 353, 430, 522, 578, 664, 918, 1190, 1241, 1337, 1658    |

Fig. S1: The B3LYP/6-311+G(d) optimized geometries (length in Å and angle in degree) for other species on triplet and singlet PESs. (a). Geometries of reactant, products and minima; (b). Geometries of the transition states on triplet PES; (c). Geometries of the transition states on singlet PES. The values in *italics* are experimental data.

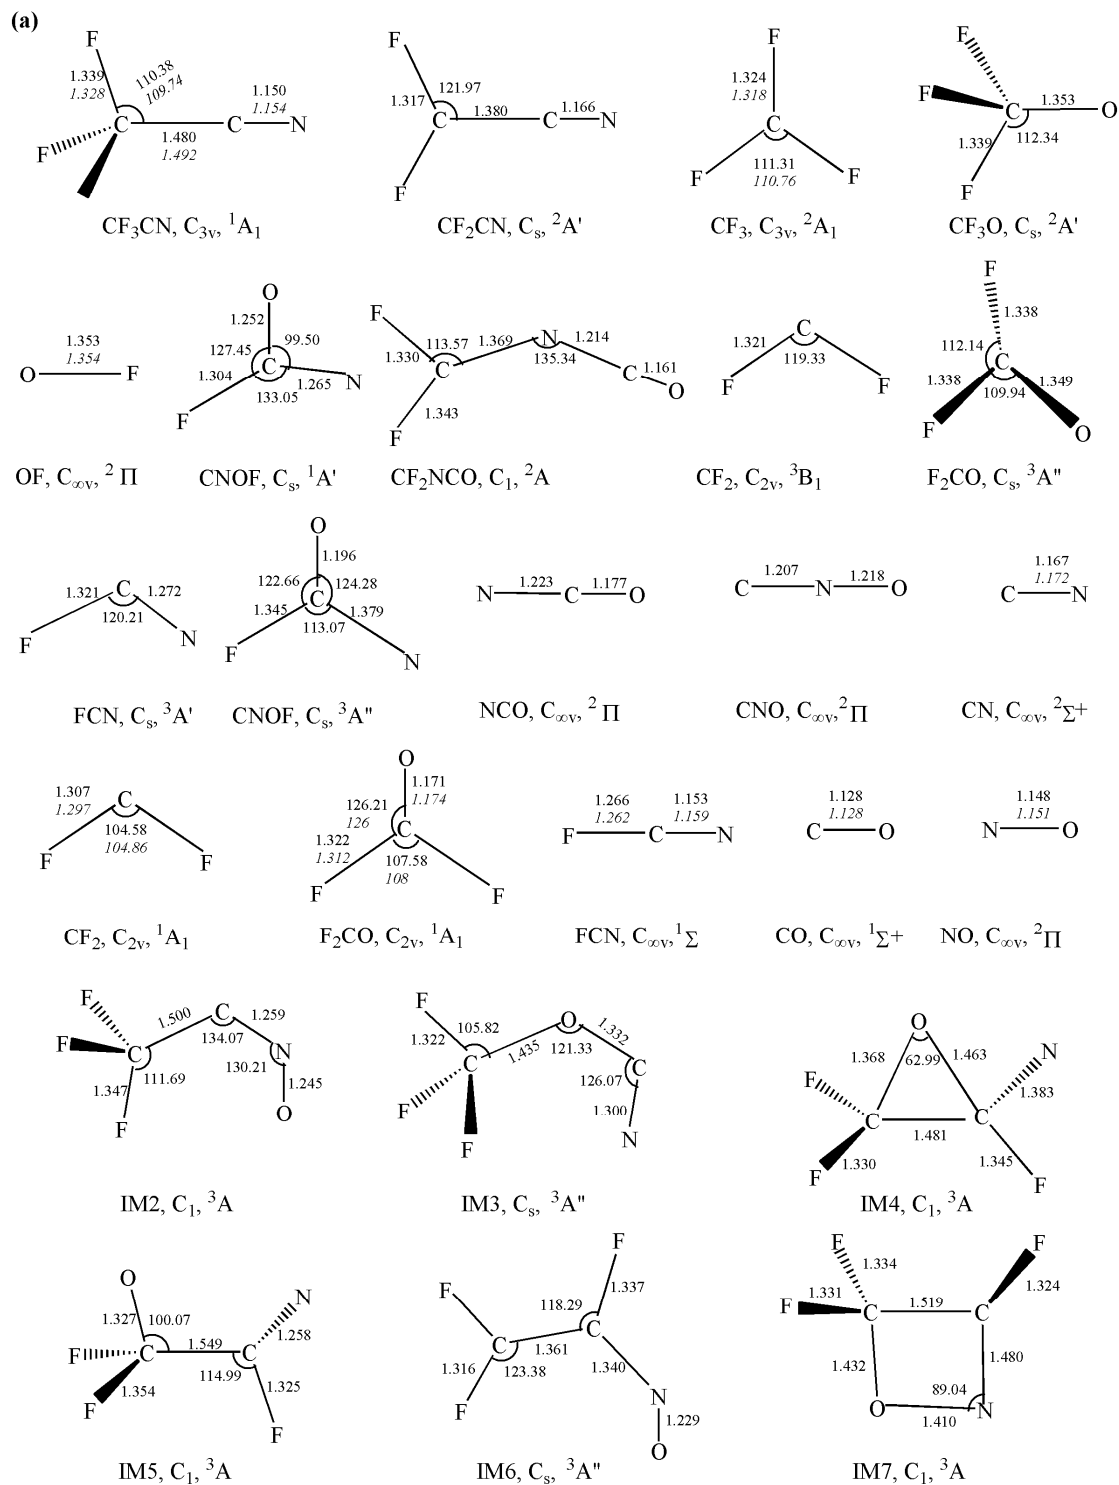

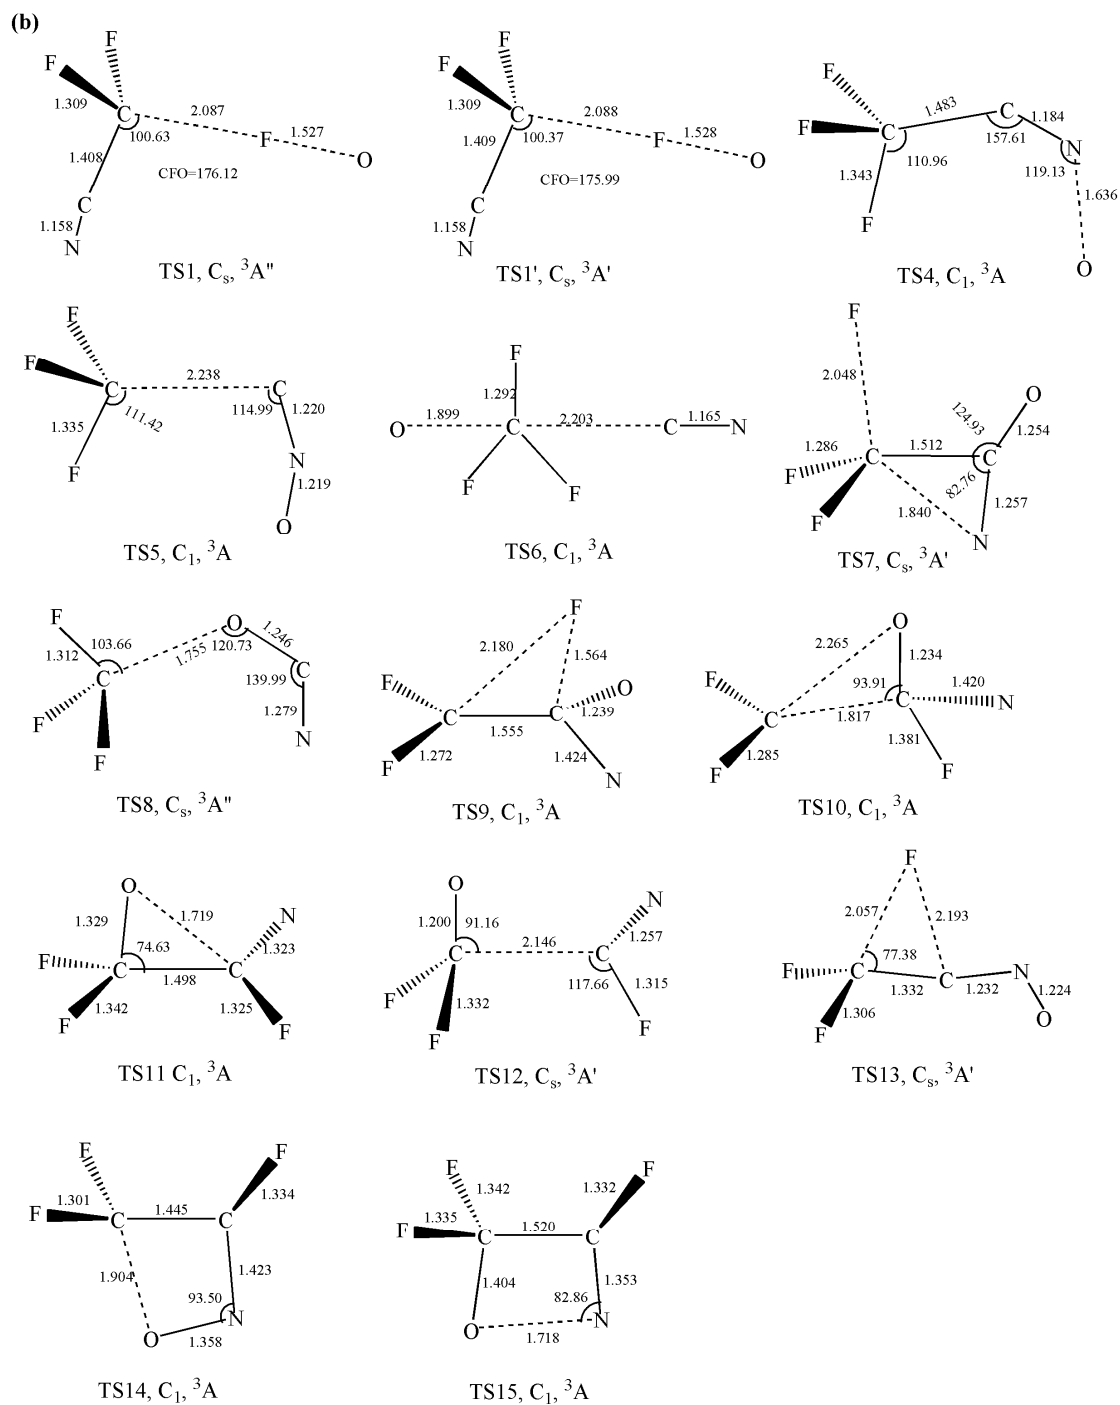

(c)

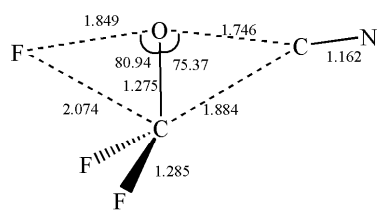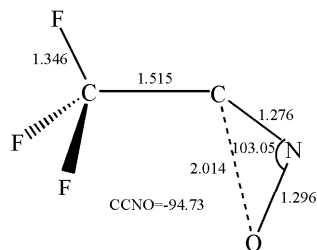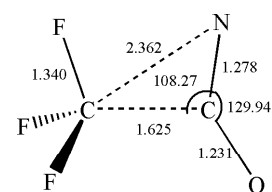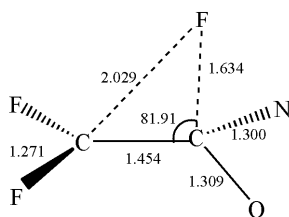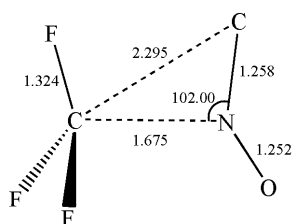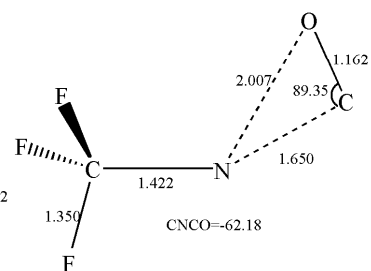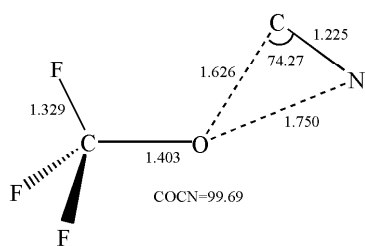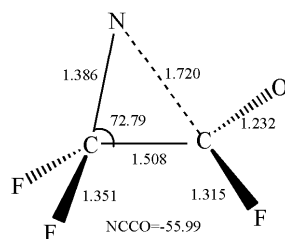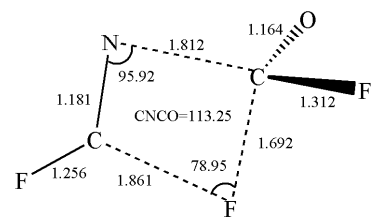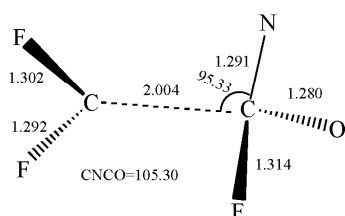

Supplement: c004284f.pdf [file c004284f.pdf]
